# Supplementary material
Source: PubMed Central journal article supplement (PMC5345629)
Supplement: BPH-174-553-s001.pdf [file BPH-174-553-s001.pdf]

# **Potent effects of dioscin against pancreatic cancer via miR-149-3P-mediated inhibition of AKT1 signaling pathway**

Lingling Si, Lina Xu, Lianhong Yin, Yan Qi, Xu Han, Youwei Xu, Yanyan Zhao,  
Changyuan Wang, Kexin Liu, Jinyong Peng\*  
*College of Pharmacy, Dalian Medical University, Western 9 Lvshunnan Road,  
Dalian 116044, China*

Corresponding author,  
Dr. Jinyong Peng  
College of Pharmacy  
Dalian Medical University  
Dalian, China  
Tel.: +86 411 8611 0411  
Fax: +86 411 8611 0411  
Email: [jinyongpeng2005@163.com](mailto:jinyongpeng2005@163.com)

**Supplemental Table 1.** The primer sequences used for real-time PCR assay in the present work.

| Gene       | Accession number | Primer (5'–3')    |
|------------|------------------|-------------------|
| MiR-149-3P | MIMAT0004609     | AGGGAGGGACGGGGGCT |

**Supplemental Table 2.** The information of the antibodies used in the present work.

| Antibody          | Source | Dilutions | Company                         |
|-------------------|--------|-----------|---------------------------------|
| AKT1              | Rabbit | 1:1000    | Proteintech Group, Chicago, USA |
| Bax               | Rabbit | 1:1000    | Proteintech Group, Chicago, USA |
| Bcl-2             | Rabbit | 1:1000    | Proteintech Group, Chicago, USA |
| Apaf-1            | Rabbit | 1:1000    | Proteintech Group, Chicago, USA |
| Cleaved caspase-3 | Rabbit | 1:1000    | Proteintech Group, Chicago, USA |
| Cytochrome C      | Rabbit | 1:1000    | Proteintech Group, Chicago, USA |
| Cleaved caspase-9 | Rabbit | 1:1000    | Invitrogen, CA, USA             |
| Cleaved PARP      | Rabbit | 1:1000    | Abcam, Cambridge, UK            |

**Supplemental Table 3.** The information of the sequences used in the present work.

| Gene                 | Primer (5'–3')                                                    |
|----------------------|-------------------------------------------------------------------|
| MiR-149-3P inhibitor | GCACAGCCCCCGUCCCUCCU                                              |
| MiR-149-3P mimics    | Forward: AGGGAGGGACGGGGGCUGUGC ;<br>Reverse: ACAGCCCCCGUCCCUCCUUU |
| AKT1 siRNA           | Forward: UGCCCUUCUACAACCAGGATT;<br>Reverse: UCCUGGUUGUAGAAGGGCATT |

**Supplemental Table 4.** Differentially expressed microRNAs caused by dioscin in ASPC-1 cells using microRNA microarray analysis.

| ID     | Gene name           | Fold change <sup>a</sup> | P-value <sup>b</sup> |
|--------|---------------------|--------------------------|----------------------|
| 169087 | hsa-miR-149-3p      | 12.495                   | 0.042                |
| 42832  | hsa-miR-638         | 9.875                    | 0.047                |
| 42466  | ebv-miR-BART18-3p   | 7.840                    | 0.015                |
| 169009 | hsa-miR-548ap-5p/hs | 7.197                    | 0.035                |
| 148085 | hsa-miR-3687        | 6.480                    | 0.010                |
| 148652 | hsa-miR-620         | 6.407                    | 0.013                |
| 148684 | hsa-miR-628-3p      | 5.923                    | 0.006                |
| 147916 | hsa-miR-3126-3p     | 5.767                    | 0.010                |
| 169189 | hsa-miR-4795-5p     | 5.650                    | 0.002                |
| 147706 | hsa-miR-4255        | 5.369                    | 0.024                |
| 169239 | hsa-miR-4732-5p     | 5.139                    | 0.007                |
| 147926 | hsa-miR-4329        | 4.642                    | 0.024                |
| 169228 | hsa-miR-4698        | 4.551                    | 0.009                |
| 169271 | hsa-miR-4784        | 4.330                    | 0.040                |
| 147614 | hsa-miR-4299        | 4.286                    | 0.007                |
| 168639 | hsa-miR-4533        | 4.111                    | 0.006                |
| 17358  | ebv-miR-BART16      | 4.010                    | 0.037                |
| 148263 | hsa-miR-1273e       | 3.927                    | 0.039                |
| 168597 | hsa-miR-5699-3p     | 3.916                    | 0.049                |
| 168911 | hsa-miR-4682        | 3.744                    | 0.011                |
| 147584 | hsa-miR-548t-5p     | 3.593                    | 0.008                |
| 146117 | hsv1-miR-H6-3p      | 3.572                    | 0.045                |
| 169395 | hsa-miR-4484        | 3.570                    | 0.040                |
| 13137  | hsa-miR-519a-5p     | 3.520                    | 0.022                |
| 42490  | hsa-miR-505-5p      | 3.395                    | 0.012                |
| 146072 | hsa-miR-1469        | 3.328                    | 0.028                |
| 27537  | ebv-miR-BART13-3p   | 3.300                    | 0.022                |
| 168637 | hsa-miR-3940-5p     | 3.261                    | 0.032                |
| 168978 | hsa-miR-371b-5p     | 3.226                    | 0.006                |
| 169050 | hsa-miR-4787-5p     | 3.222                    | 0.027                |
| 148068 | hsa-miR-758-5p      | 3.199                    | 0.020                |
| 168994 | hsa-miR-3591-5p     | 3.166                    | 0.001                |
| 42442  | hsa-miR-498         | 3.126                    | 0.004                |
| 168863 | hsa-miR-4441        | 3.079                    | 0.015                |
| 169185 | hsa-miR-5187-3p     | 2.886                    | 0.011                |
| 168640 | hsa-miR-4475        | 2.884                    | 0.001                |
| 169341 | hsa-miR-4632-3p     | 2.745                    | 0.002                |
| 17327  | hsa-miR-630         | 2.737                    | 0.038                |
| 146158 | hsa-miR-3202        | 2.719                    | 0.043                |
| 168557 | hsa-miR-4777-5p     | 2.666                    | 0.006                |
| 42522  | ebv-miR-BART19-3p   | 2.632                    | 0.042                |

|        |                 |       |       |
|--------|-----------------|-------|-------|
| 168899 | hsa-miR-1285-5p | 2.621 | 0.001 |
| 17492  | sv40-miR-S1-5p  | 2.597 | 0.016 |
| 168852 | hsa-miR-4764-5p | 2.566 | 0.024 |
| 169035 | hsa-miR-4658    | 2.534 | 0.043 |
| 46479  | hsa-miR-1304-5p | 2.482 | 0.016 |
| 146068 | hsa-miR-1915-3p | 2.406 | 0.004 |
| 168805 | hsa-miR-4478    | 2.349 | 0.029 |
| 168963 | hsa-miR-664b-5p | 2.302 | 0.011 |
| 168661 | hsa-miR-4531    | 2.289 | 0.018 |
| 146165 | hsa-miR-1973    | 2.242 | 0.016 |
| 147836 | hsv2-miR-H7-5p  | 2.236 | 0.004 |
| 168605 | hsa-miR-4653-3p | 2.236 | 0.003 |
| 168653 | hsa-miR-3158-5p | 2.213 | 0.009 |
| 148420 | hsa-miR-3607-3p | 2.208 | 0.000 |
| 168709 | hsa-miR-4429    | 2.178 | 0.027 |
| 42696  | hsa-miR-943     | 2.136 | 0.009 |
| 169031 | hsa-miR-4726-5p | 2.129 | 0.025 |
| 169254 | hsa-miR-4762-3p | 0.043 | 0.048 |
| 42672  | hsa-miR-323b-5p | 0.049 | 0.004 |
| 148674 | hsa-miR-4321    | 0.065 | 0.026 |
| 168915 | hsa-miR-4780    | 0.083 | 0.039 |
| 168871 | hsa-miR-151a-5p | 0.119 | 0.005 |
| 10985  | hsa-miR-191-5p  | 0.126 | 0.032 |
| 169214 | hsa-miR-4638-5p | 0.132 | 0.024 |
| 42887  | hsa-miR-331-3p  | 0.172 | 0.002 |
| 11260  | hsa-miR-151a-5p | 0.173 | 0.001 |
| 145638 | hsa-miR-29a-5p  | 0.183 | 0.001 |
| 27533  | hsa-miR-320a    | 0.185 | 0.011 |
| 42923  | hsa-miR-30c-5p  | 0.192 | 0.007 |
| 11020  | hsa-miR-22-3p   | 0.198 | 0.008 |
| 169129 | hsa-miR-4284    | 0.200 | 0.010 |
| 148430 | hsa-miR-374c-5p | 0.201 | 0.010 |
| 169407 | hsa-miR-4301    | 0.202 | 0.005 |
| 146159 | hsv1-miR-H4-3p  | 0.209 | 0.009 |
| 17280  | hsa-miR-15b-5p  | 0.210 | 0.031 |
| 42783  | hsa-miR-197-3p  | 0.218 | 0.008 |
| 145634 | hsa-miR-132-5p  | 0.219 | 0.009 |
| 145701 | hsa-miR-668-3p  | 0.227 | 0.022 |
| 168798 | hsa-miR-4668-5p | 0.228 | 0.045 |
| 14301  | hsa-miR-361-5p  | 0.243 | 0.005 |
| 169408 | hsa-miR-181d-5p | 0.249 | 0.001 |
| 148098 | hsa-miR-374b-5p | 0.250 | 0.025 |
| 13147  | hsa-miR-96-5p   | 0.273 | 0.002 |
| 19582  | hsa-miR-106b-5p | 0.276 | 0.028 |

|        |                 |       |       |
|--------|-----------------|-------|-------|
| 11023  | hsa-miR-222-3p  | 0.278 | 0.002 |
| 145676 | hsa-miR-30e-3p  | 0.284 | 0.011 |
| 4610   | hsa-miR-126-3p  | 0.300 | 0.011 |
| 147588 | hsa-miR-4288    | 0.324 | 0.000 |
| 10975  | hsa-miR-182-5p  | 0.326 | 0.007 |
| 42446  | hsa-miR-576-5p  | 0.328 | 0.005 |
| 42744  | hsa-miR-23a-3p  | 0.328 | 0.008 |
| 146112 | hsa-miR-30b-5p  | 0.344 | 0.040 |
| 145845 | hsa-miR-20a-5p  | 0.354 | 0.037 |
| 46438  | hsa-let-7g-5p   | 0.362 | 0.007 |
| 169070 | hsa-miR-4695-3p | 0.385 | 0.003 |
| 46732  | hsa-miR-1264    | 0.395 | 0.007 |
| 28966  | hsa-miR-574-3p  | 0.399 | 0.027 |
| 147776 | hsa-miR-4317    | 0.401 | 0.015 |
| 169336 | hsa-miR-17-5p   | 0.406 | 0.030 |
| 9938   | hsa-let-7i-5p   | 0.444 | 0.036 |
| 42730  | hsa-miR-423-3p  | 0.463 | 0.030 |
| 17506  | hsa-miR-24-3p   | 0.477 | 0.033 |
| 145742 | hsa-miR-935     | 0.479 | 0.022 |
| 147199 | hsa-miR-27b-3p  | 0.480 | 0.039 |
| 147506 | hsa-miR-21-5p   | 0.491 | 0.029 |

---

<sup>a</sup> The ratio of normalized intensities between two conditions (use normalized data, ratio scale).

<sup>b</sup> T-test result between the tested samples in different groups.

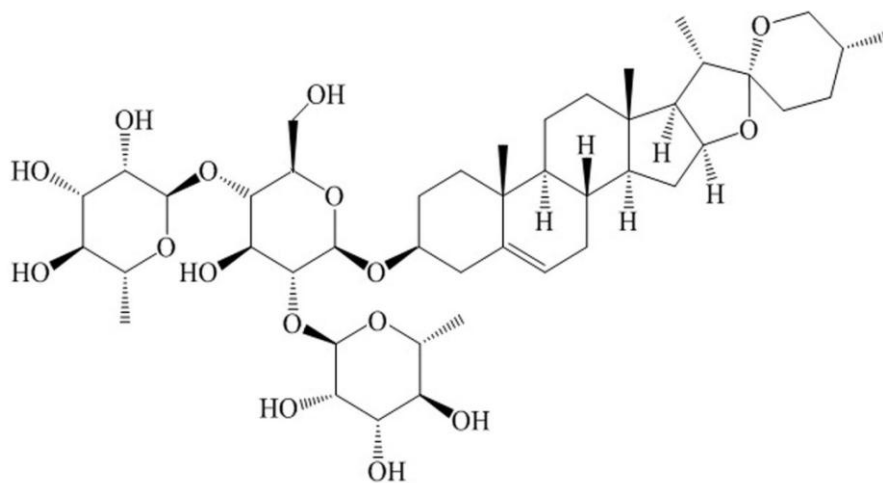

**Supplemental Fig. 1.** The chemical structure of dioscin.



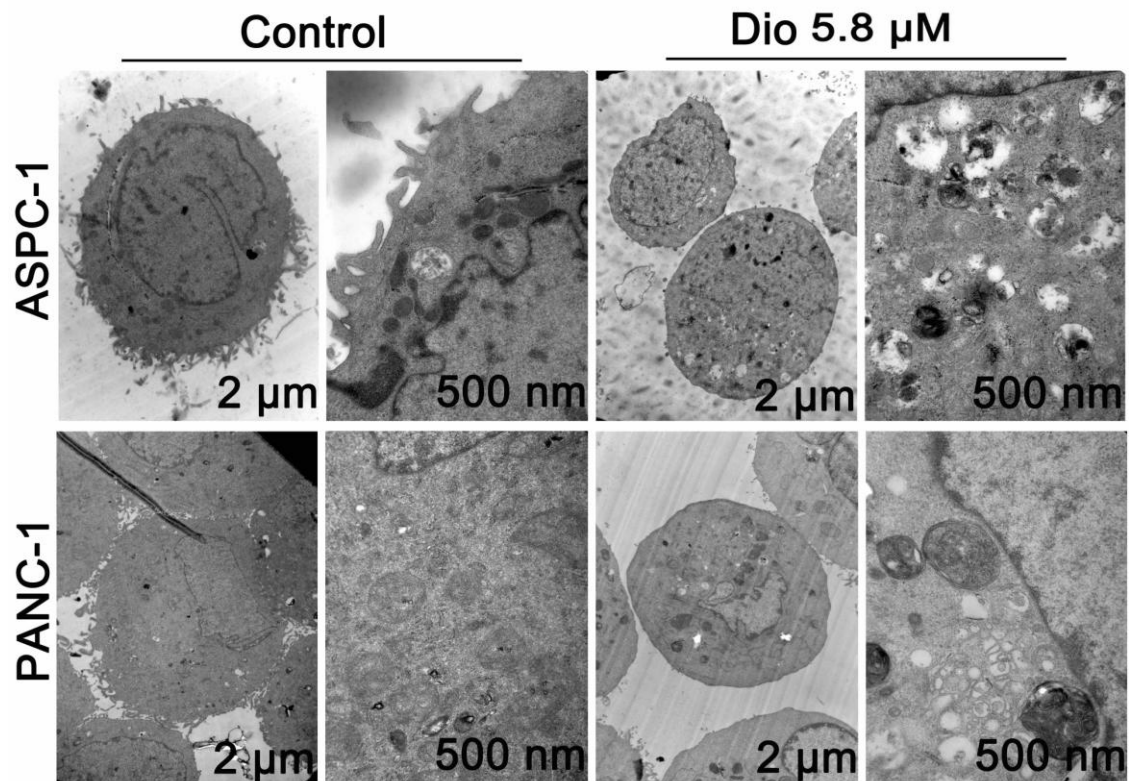

**Supplemental Fig. 2.** TEM micrographs of ASPC-1 and PANC-1 cells without or with dioscin (5.8  $\mu\text{M}$ ) for 24 h in different magnifications (8000  $\times$  in the left and 30000  $\times$  in the right).

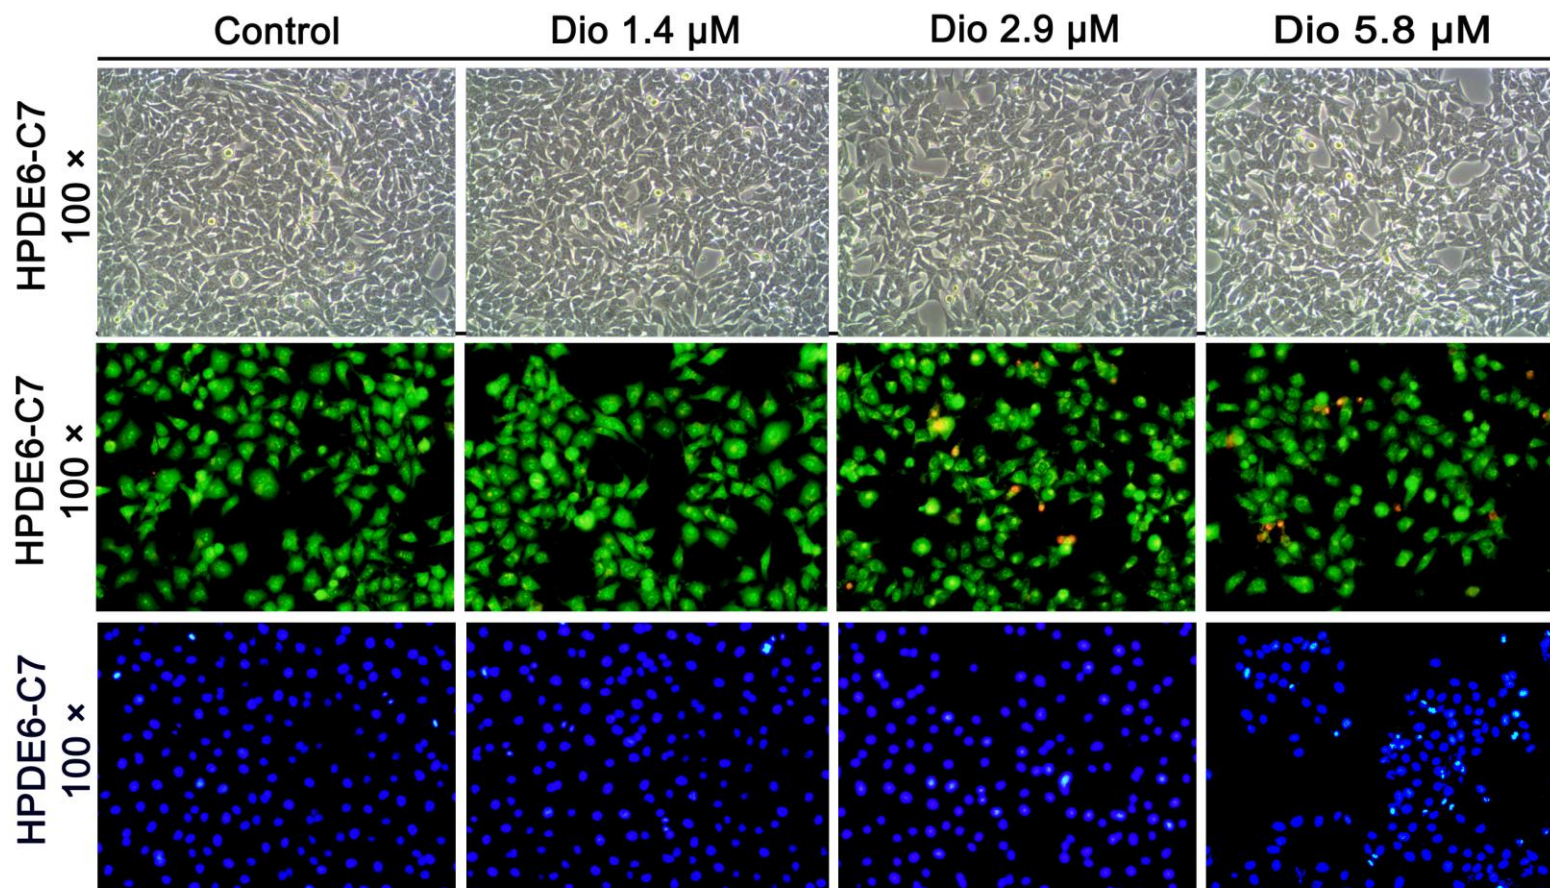

**Supplemental Fig. 3.** Effects of different concentrations of dioscin (1.4, 2.9 and 5.8  $\mu\text{M}$ ) for 24 h on HPDE6-C7 cell morphology and structure (100 $\times$  magnification).

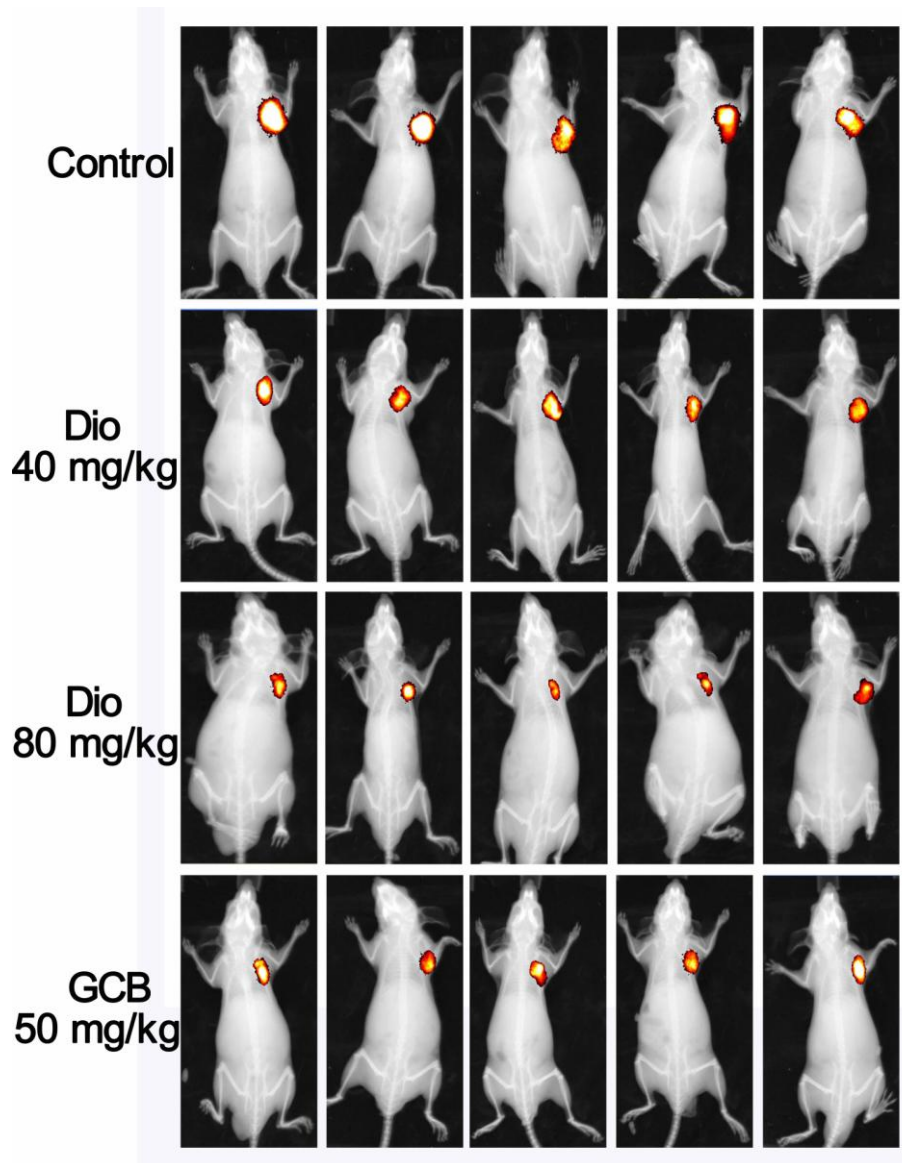

**Supplemental Fig. 4.** The raw bioluminescence images of the ASPC-1 cells-inoculated mice (n = 5).

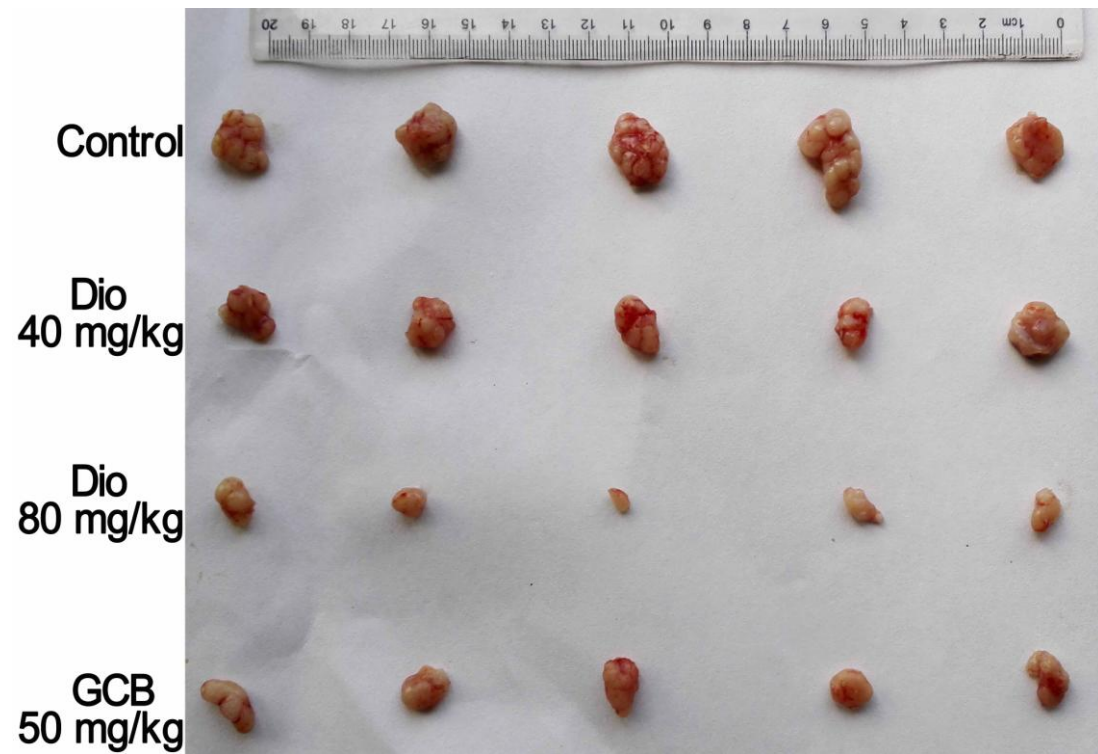

**Supplemental Fig. 5.** The raw tumors images of the ASPC-1 cells-inoculated mice (n = 5).

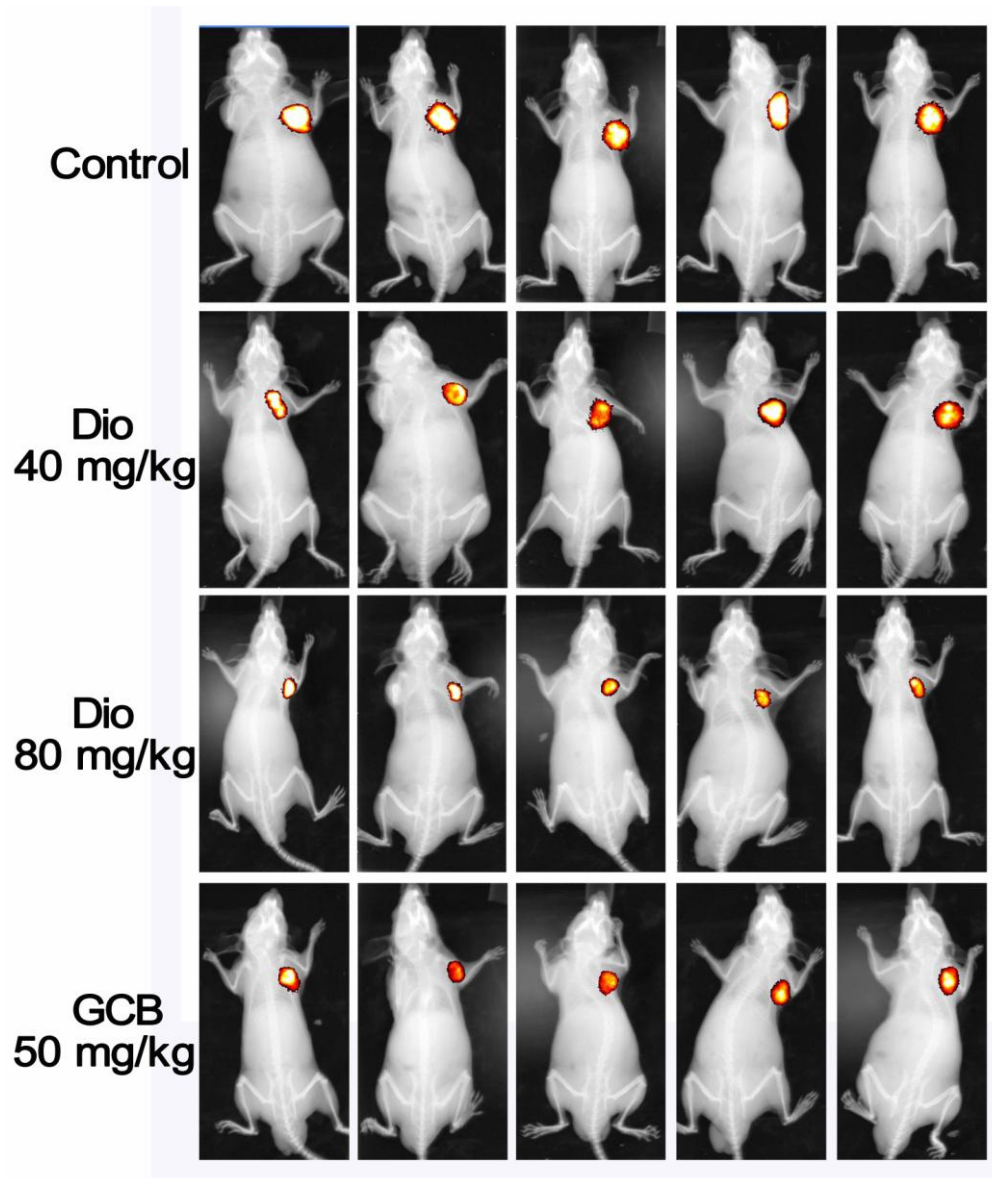

**Supplemental Fig. 6.** The raw bioluminescence images of the PANC-1 cells-inoculated mice (n = 5).

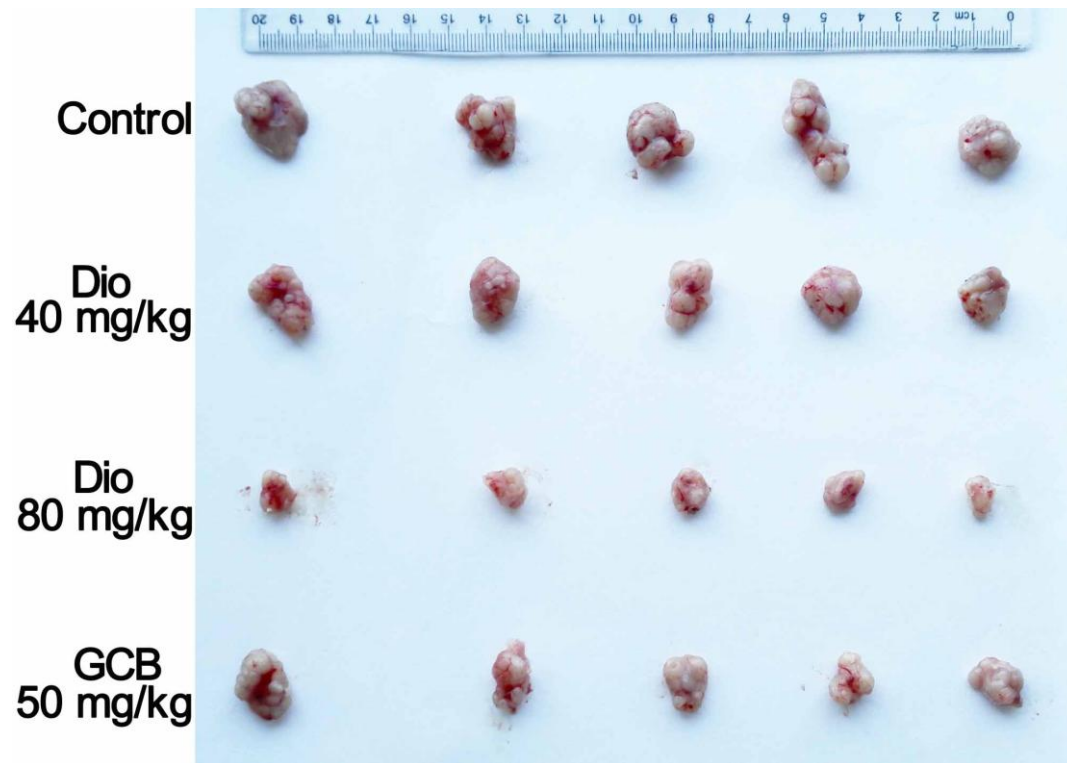

**Supplemental Fig. 7.** The raw tumors images of the PANC-1 cells-inoculated mice (n = 5).

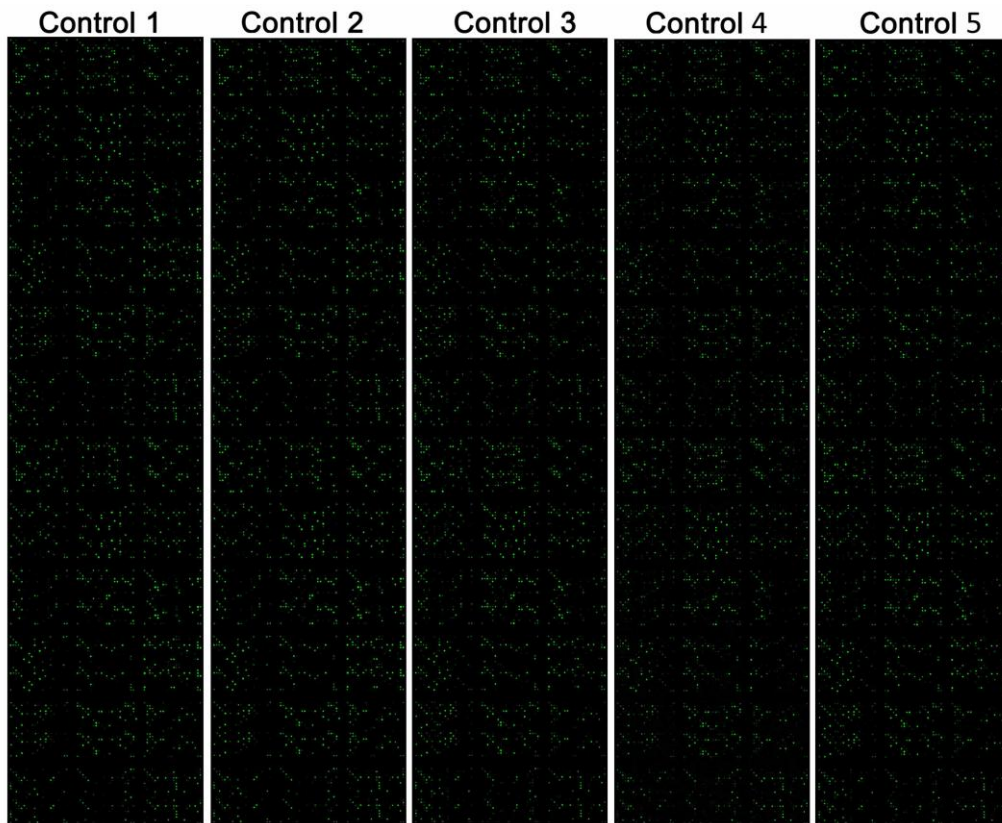

**Supplemental Fig. 8.** Detection of miRNAs by microarrays. Total RNAs extracted from control groups were covalently labeled with Hy3 (green channel) and hybridized to the array.

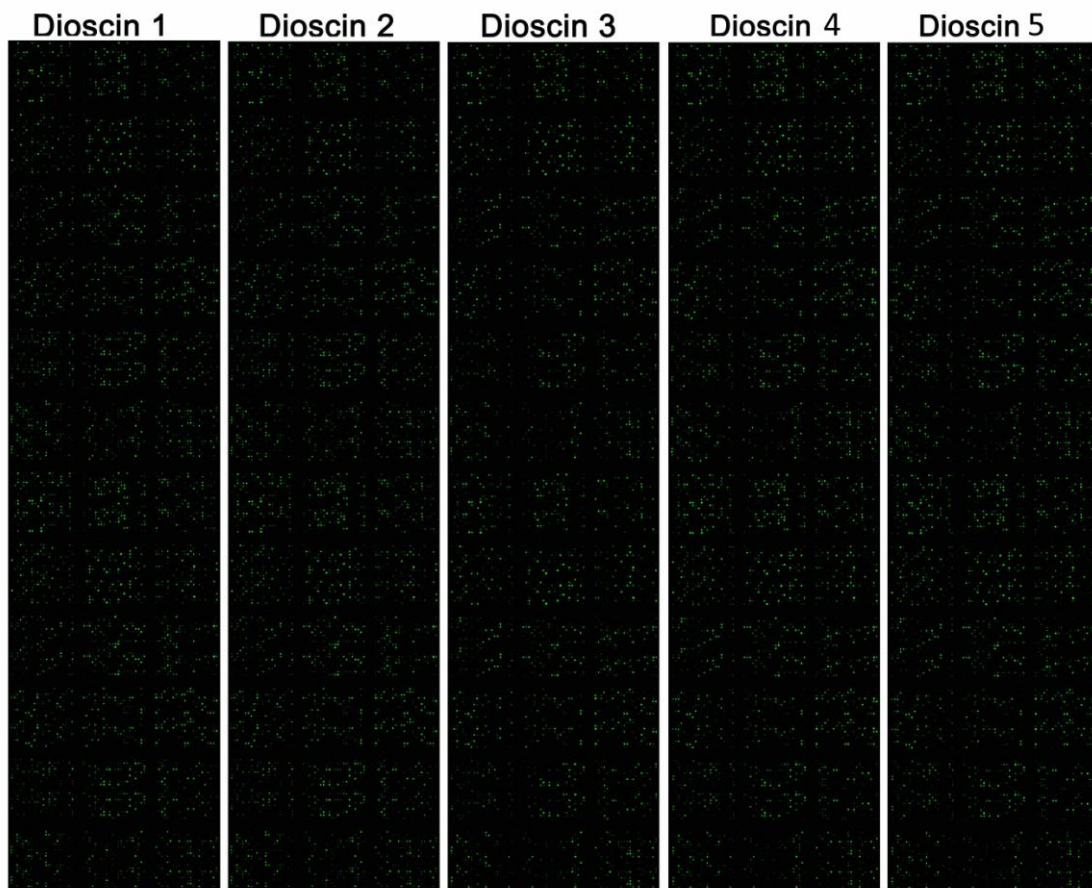

**Supplemental Fig. 9.** Detection of miRNAs by microarrays. Total RNAs extracted from dioscin-treated group (5.8  $\mu$ M) were covalently labeled with Hy3 (green channel) and hybridized to the array.



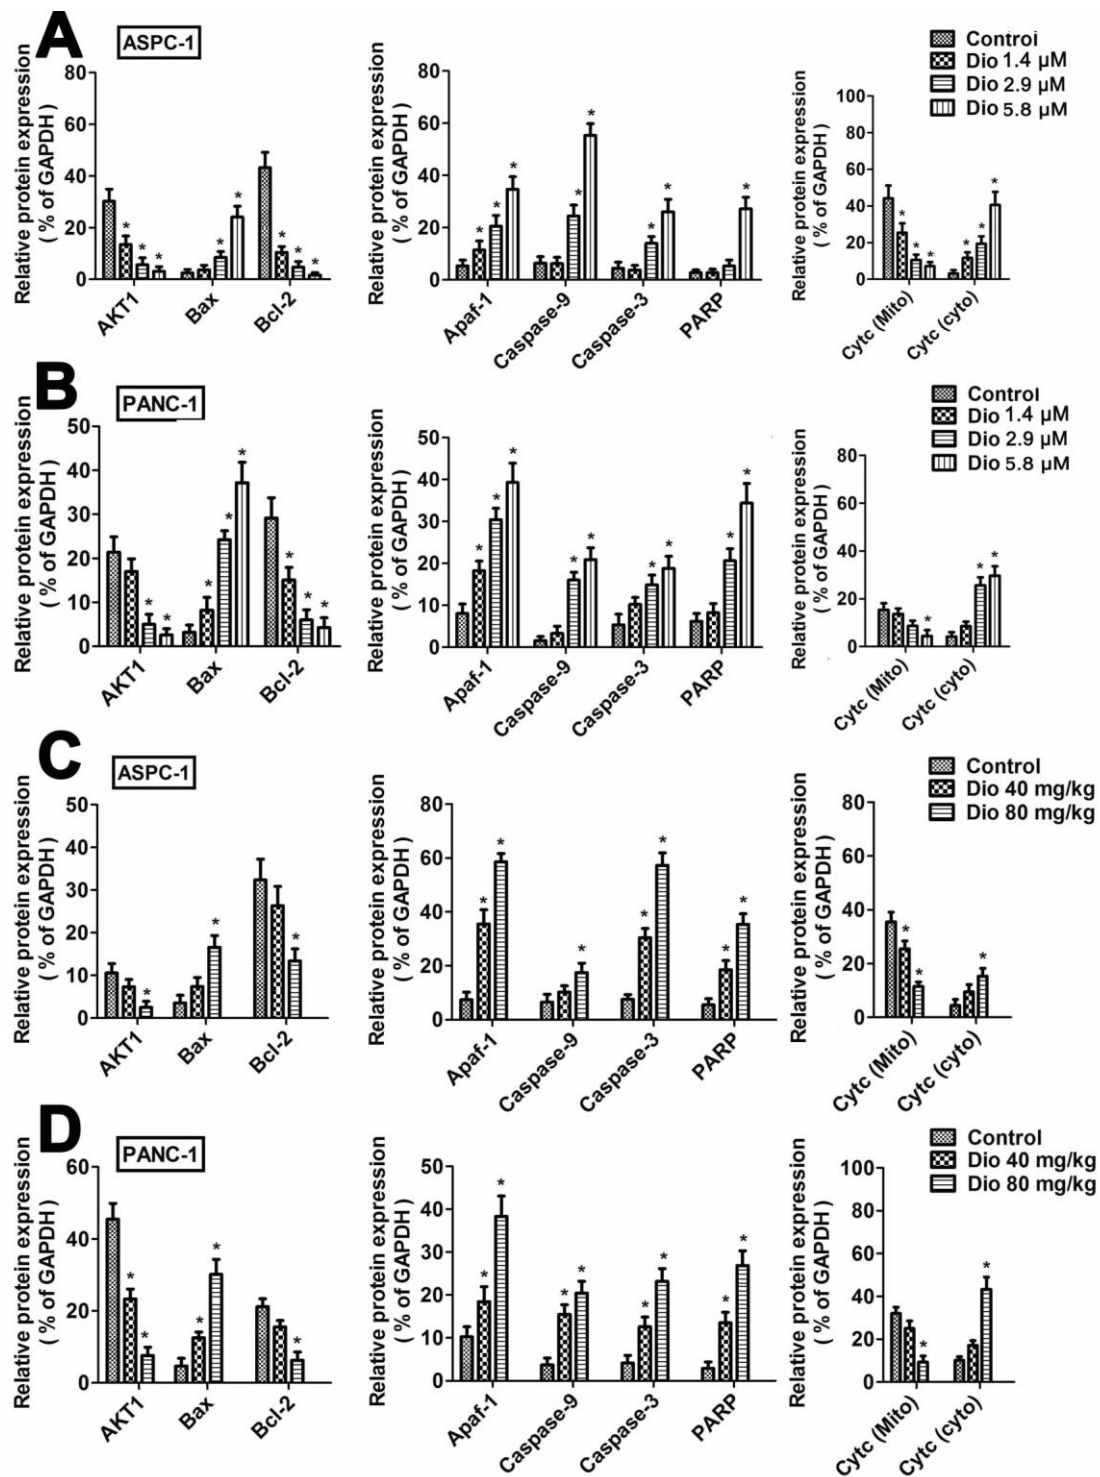

**Supplemental Fig. 10. (A-D)** Analytical results the protein levels of AKT1, Bax, Bcl-2, Apaf-1, Cleaved caspase-3/9, cleaved PARP and Cytochrome c treated by dioscin *in vitro* and *in vivo*. Data are presented as the mean  $\pm$  S.D. (n = 5). \*P < 0.05 compared with control groups.

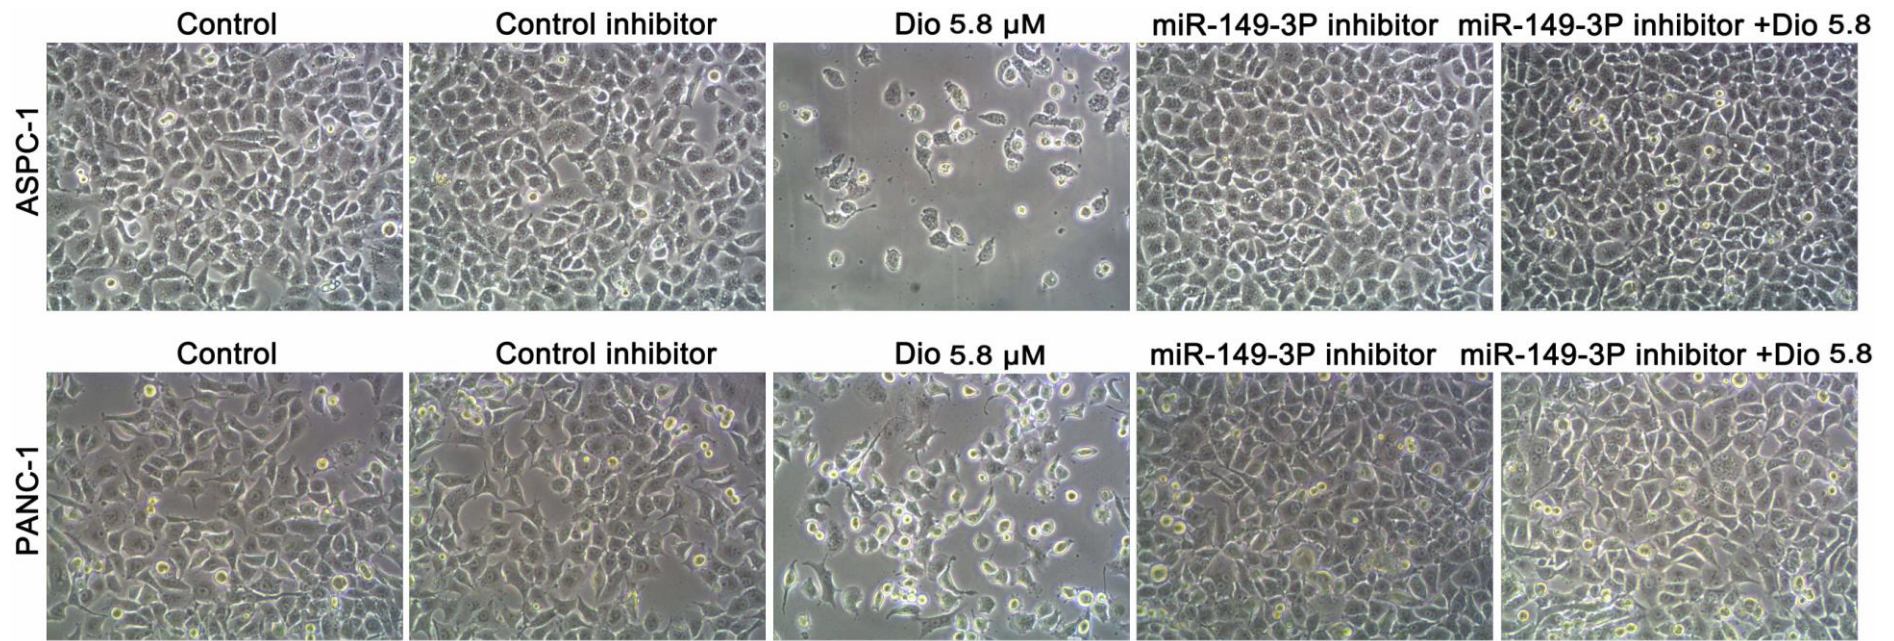

**Supplemental Fig. 11.** Effects of dioscin on cellular morphology and structure of ASPC-1 and PANC-1 cells by bright image ( $\times 100$ , magnification) investigation with or without transfecting miR-149-3P inhibitor *in vitro*.

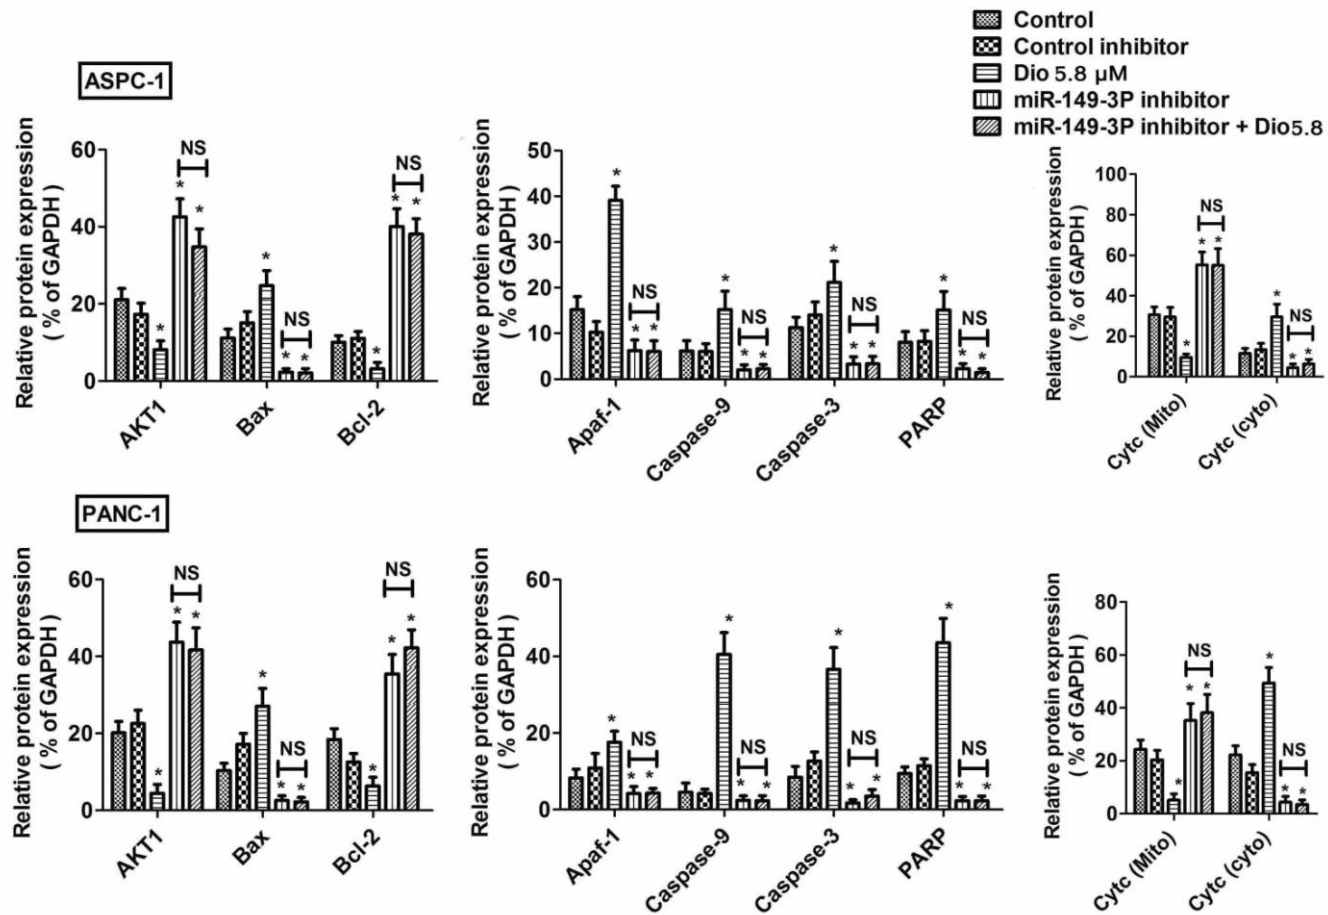

**Supplemental Fig. 12.** Analytical results the protein levels of AKT1, Bax, Bcl-2, Apaf-1, Cleaved caspase-3/9, cleaved PARP and Cytochrome c after treated with miR-149-3P inhibitor in ASPC-1 and PANC-1 cells. Data are presented as the mean  $\pm$  S.D. (n = 5). \*P < 0.05 compared with control inhibitor group; NS, not significant.

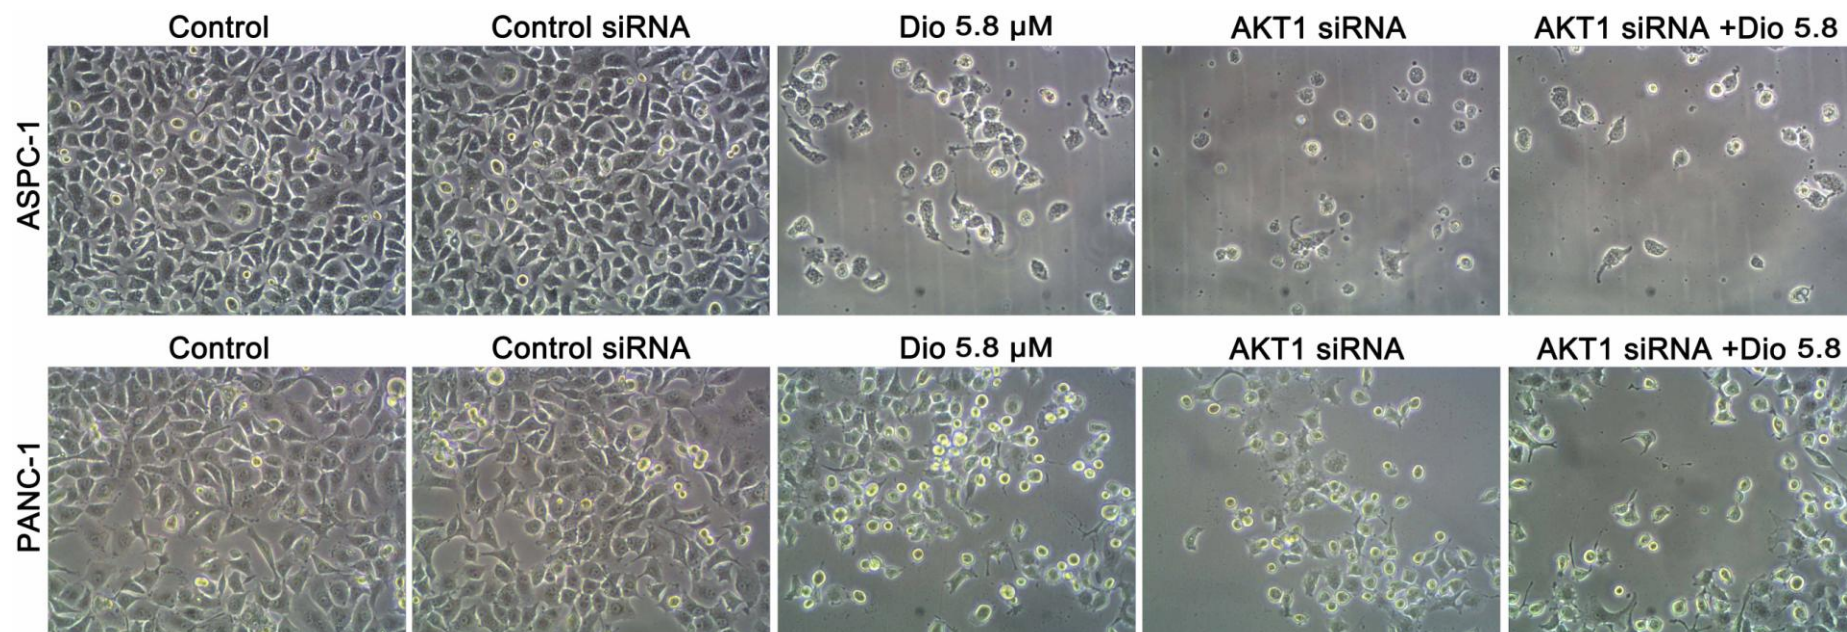

**Supplemental Fig. 13.** Effects of dioscin on cellular morphologies and structures of ASPC-1 and PANC-1 cells by bright image ( $\times 100$ , magnification) investigation with or without transfecting AKT1 siRNA *in vitro*.

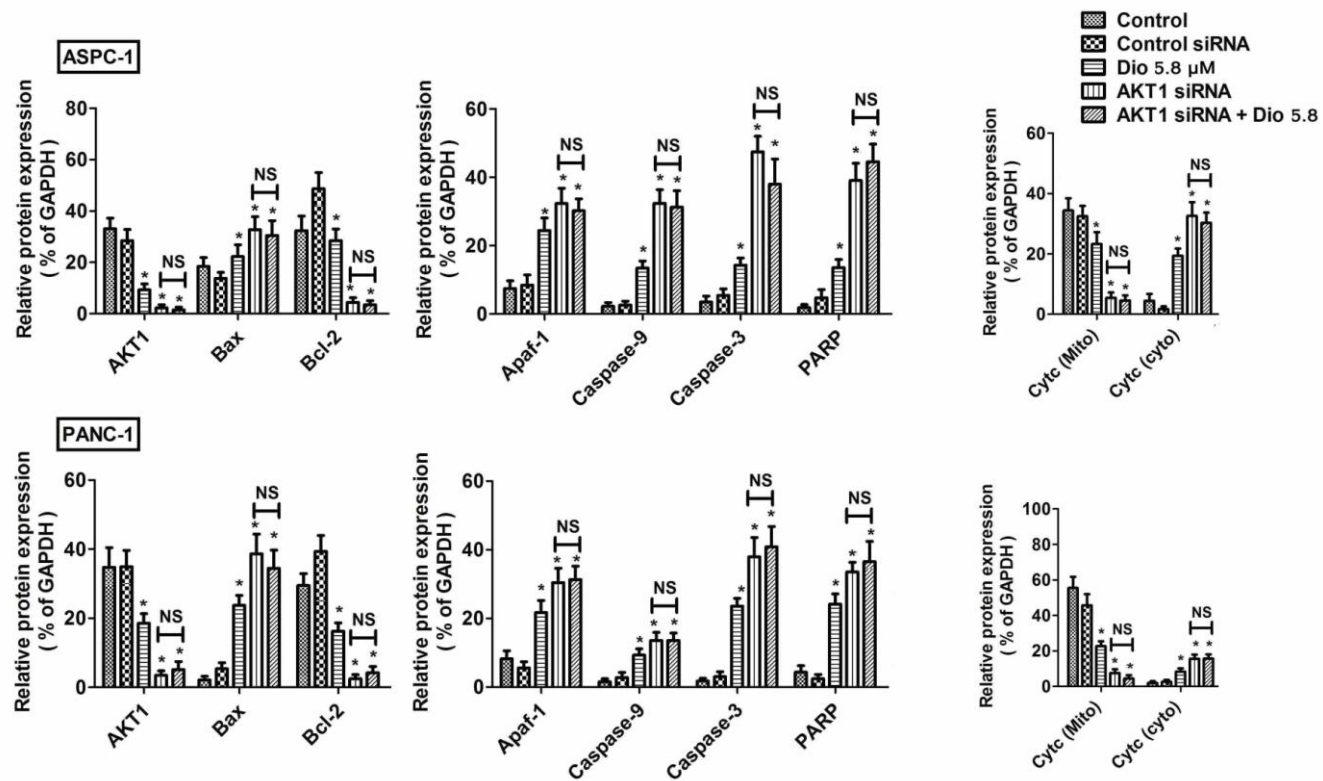

**Supplemental Fig. 14.** Analytical results the protein levels of AKT1, Bax, Bcl-2, Apaf-1, Cleaved caspase-3/9, cleaved PARP, Cytochrome c after treated with AKT1 siRNA in ASPC-1 and PANC-1 cells. Data are presented as the mean  $\pm$  S.D. (n = 5). \*P < 0.05 compared with control siRNA group; NS, not significant.
